# Supplementary material for: Dominant CD8+ T Cell Nucleocapsid Targeting in SARS-CoV-2 Infection and Broad Spike Targeting From Vaccination
Source: PubMed Central journal article supplement (PMC8902813; doi:10.3389/fimmu.2022.835830), 2022-02-22
Supplement: DataSheet_1.pdf [file DataSheet_1.pdf]

**Dominant CD8<sup>+</sup> T Cell Nucleocapsid Targeting in SARS-CoV-2  
Infection and Broad Spike Targeting from Vaccination  
(Supplemental Materials)**

Ellie Taus<sup>1</sup>, Christian Hofmann<sup>2</sup>, F. Javier Ibarondo<sup>2</sup>, Mary Ann Hausner<sup>2</sup>, Jennifer A. Fulcher<sup>2</sup>,  
Paul Krogstad<sup>1,3</sup>, Kathie G. Ferbas<sup>2</sup>, Nicole H. Tobin<sup>3</sup>, Anne W. Rimoin<sup>4</sup>, Grace M. Aldrovandi<sup>3</sup>,  
Otto O. Yang<sup>2,5\*</sup>

<sup>1</sup> Department of Molecular and Medical Pharmacology, David Geffen School of Medicine,  
University of California, Los Angeles, Los Angeles, CA, USA

<sup>2</sup> Department of Medicine, David Geffen School of Medicine, University of California Los  
Angeles, Los Angeles, CA, USA

<sup>3</sup> Department of Pediatrics, David Geffen School of Medicine, University of California Los  
Angeles, Los Angeles, CA, USA

<sup>4</sup> Fielding School of Public Health, University of California Los Angeles, Los Angeles, CA, USA

<sup>5</sup> Department of Microbiology, Immunology, and Molecular Genetics, David Geffen School of  
Medicine, University of California Los Angeles, Los Angeles, CA, USA

\*Corresponding author:

Otto Yang  
BSRB 173, 615 Charles E Young Drive South, Los Angeles, CA 90095  
Phone: 310-794-9491  
Facsimile: 310-983-1067  
Email: oyang@mednet.ucla.edu

## SUPPLEMENTAL FIGURES

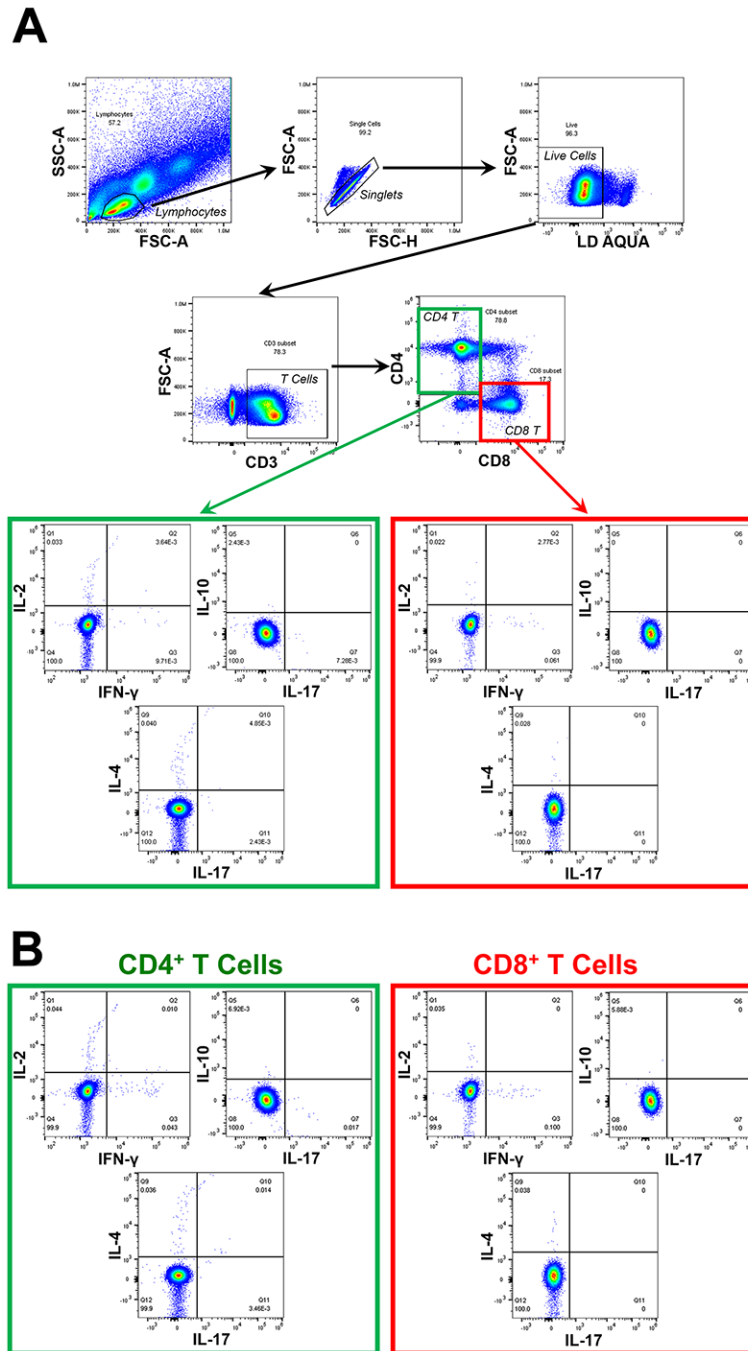

**Supplemental Figure S1. Flow cytometry gating strategy and sample data.** A. T cells were defined as CD3<sup>+</sup> cells within the live cell singlet lymphocyte population, and evaluated as CD4<sup>+</sup> and CD8<sup>+</sup> subsets. Unstimulated cell results are shown in the colored boxes reflecting the final gated cells. B. Representative megapool-stimulated cell results are shown.

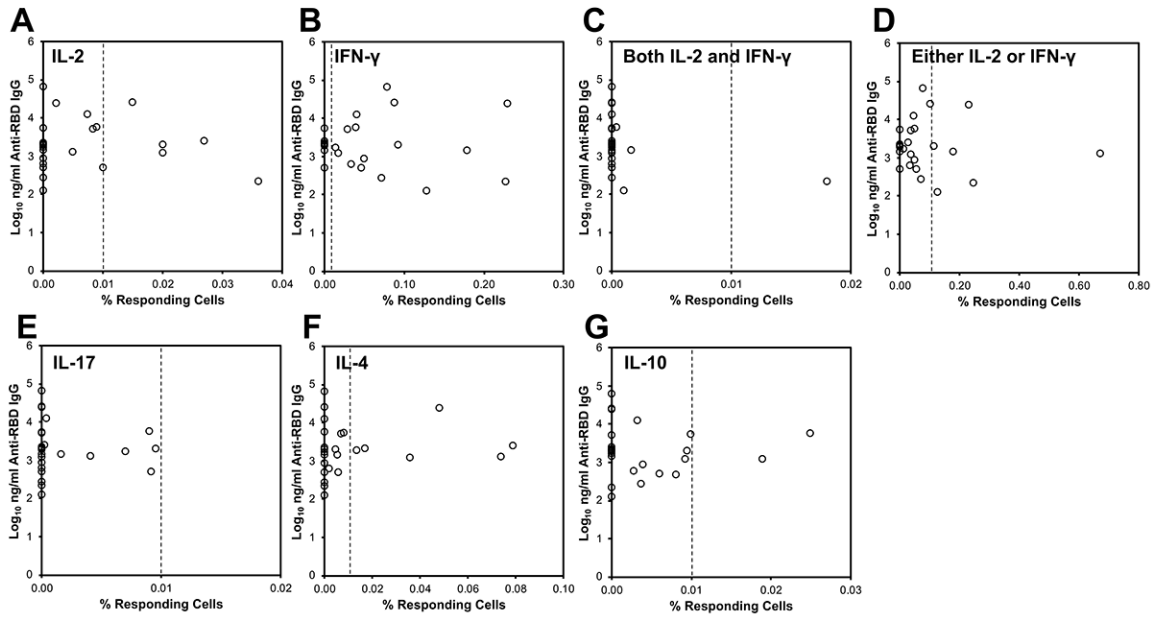

**Supplemental Figure S2. Comparison of CD8<sup>+</sup> T cell cytokine responses against SARS-CoV-2 to serum anti-RBD antibody levels demonstrates no correlation.** SARS-CoV-2-specific responses defined as in Figure 1 (x-axis) were compared to serum anti-RBD IgG antibody levels (y-axis). The vertical dotted line indicates 0.01% responding cells producing the indicated cytokine(s).

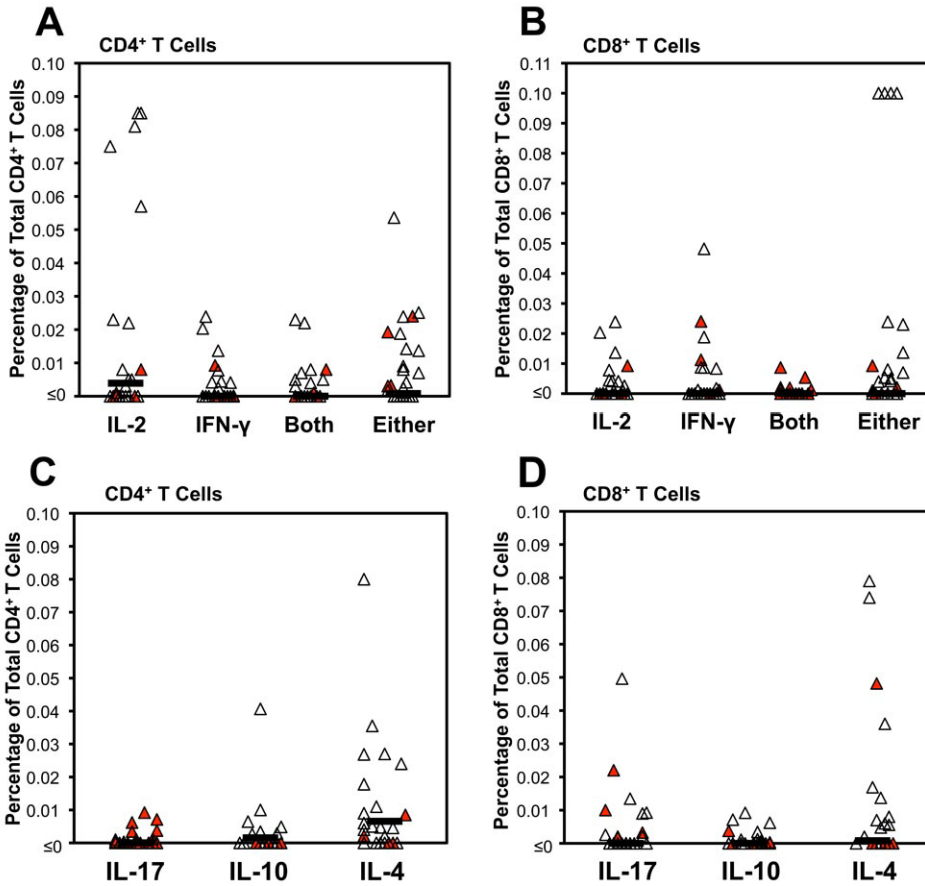

**Supplemental Figure S3. Intracellular cytokine staining for T cell responses against SARS-CoV-2 early after infection (using pooled predicted CD8<sup>+</sup> T cell epitopes) for IL-2, IFN- $\gamma$ , IL-17, IL-10, and IL-4 yields similar results to those in Figure 1. Cytokine responses were defined as in Figure 1, except using pooled predicted CD8<sup>+</sup> T cell epitope peptides. Filled symbols indicate persons with severe infection.**



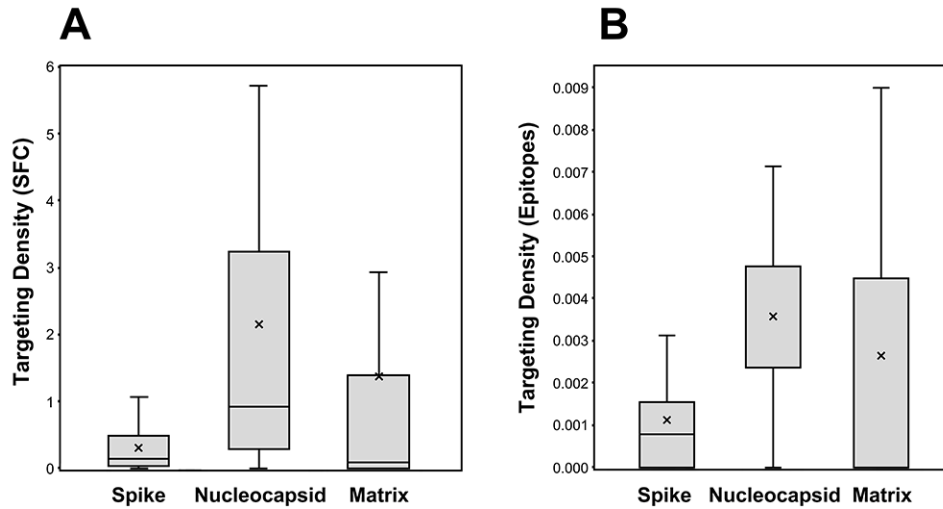

**Supplemental Figure S5. The targeting density of SARS-CoV-2 CD8<sup>+</sup> T cell responses is highest against nucleocapsid.** For the 44 persons in whom ELISpot responses were defined against spike, nucleocapsid, and matrix proteins (Figure 3), the densities of targeting in the context of protein size (1273 amino acids for spike, 419 amino acids for nucleocapsid, 222 amino acids for matrix) were calculated.

Panel A: Targeting density was defined as the ratio of SFC/10<sup>6</sup> CD8<sup>+</sup> T cells/# amino acids.

Panel B: Targeting density was defined as the ratio of epitopes (approximated by recognized peptide pools)/# amino acids.

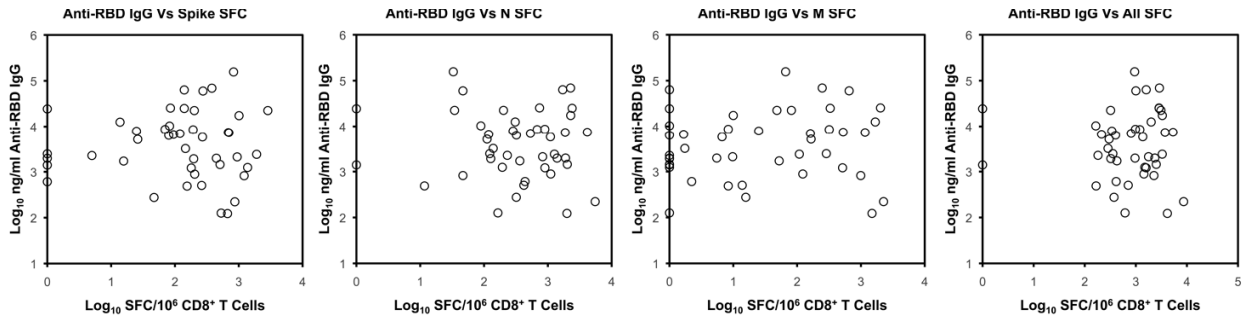

**Supplemental Figure S6. CD8<sup>+</sup> T cell responses by IFN- $\gamma$  ELISpot against SARS-CoV-2 do not correlate to serum anti-RBD antibody levels.** CD8<sup>+</sup> T cell responses against spike, nucleocapsid (N), and matrix (M) depicted in Figure 3 were plotted against anti-RBD IgG levels.

**SUPPLEMENTAL TABLES**

| <b>Initial Surface/Viability Stain Panel</b> |                  |                                                           |
|----------------------------------------------|------------------|-----------------------------------------------------------|
| <b>Target</b>                                | <b>Label</b>     | <b>Catalog#, Company</b>                                  |
| CD3                                          | Super Bright 436 | #62-0037-42, eBioscience, San Diego, CA                   |
| CD8                                          | Super Bright 600 | #63-0088-42, eBioscience, San Diego, CA                   |
| CD4                                          | PE-Cy7           | #25-0049-42, eBioscience, San Diego, CA                   |
| (Viability)                                  | Fixable Aqua     | #L34957, Invitrogen, Waltham, MA                          |
| <b>Intracellular Cytokine Stain Panel</b>    |                  |                                                           |
| <b>Target</b>                                | <b>Label</b>     | <b>Catalog#, Company</b>                                  |
| IL-4                                         | PE               | #130-091-647, Miltenyi Biotec, Bergisch Gladbach, Germany |
| IL-2                                         | PerCP-Cy5.5      | #506504, BioLegend, San Diego, CA                         |
| IL-10                                        | APC              | # 506807, BioLegend, San Diego, CA                        |
| IL-17                                        | APC-eFluor       | # 47-7179-42, eBioscience, San Diego, CA                  |
| IFN- $\gamma$                                | FITC             | #506504, BioLegend, San Diego, CA                         |

**Supplemental Table S1. Antibodies utilized for surface and intracellular cytokine staining flow cytometry.**



|                                  | <u>Pool</u> | <u># Peptides</u> | <u>Peptide Number</u> |             | <u>Amino Acid Number</u> |             |
|----------------------------------|-------------|-------------------|-----------------------|-------------|--------------------------|-------------|
|                                  |             |                   | <u>First</u>          | <u>Last</u> | <u>First</u>             | <u>Last</u> |
| <b>Spike Pools</b>               | S1          | 15                | 1                     | 15          | 1                        | 115         |
|                                  | S2          | 15                | 16                    | 30          | 106                      | 220         |
|                                  | S3          | 15                | 31                    | 45          | 211                      | 325         |
|                                  | S4          | 15                | 46                    | 60          | 316                      | 430         |
|                                  | S5          | 15                | 61                    | 75          | 421                      | 535         |
|                                  | S6          | 15                | 76                    | 90          | 526                      | 640         |
|                                  | S7          | 15                | 91                    | 105         | 631                      | 745         |
|                                  | S8          | 15                | 106                   | 120         | 736                      | 850         |
|                                  | S9          | 15                | 121                   | 135         | 841                      | 955         |
|                                  | S10         | 15                | 136                   | 150         | 946                      | 1060        |
|                                  | S11         | 15                | 151                   | 165         | 1051                     | 1165        |
|                                  | S12         | 16                | 166                   | 181         | 1156                     | 1273        |
| Note: RBD is amino acids 319-541 |             |                   |                       |             |                          |             |
| <b>Nucleocapsid Pools</b>        | N1          | 15                | 1                     | 15          | 1                        | 115         |
|                                  | N2          | 15                | 16                    | 30          | 106                      | 220         |
|                                  | N3          | 15                | 31                    | 45          | 211                      | 325         |
|                                  | N4          | 14                | 46                    | 59          | 316                      | 419         |
| <b>Matrix Pools</b>              | M1          | 15                | 1                     | 15          | 1                        | 115         |
|                                  | M2          | 16                | 16                    | 31          | 106                      | 199         |
| <b>Envelope Pool</b>             | E           | 10                | 1                     | 10          | 1                        | 75          |

**Supplemental Table S2. Peptide pools utilized for ELISpot mapping.**
